# Supplementary material for: Top-down constraints on global N 2 O emissions at optimal resolution: application of a new dimension reduction technique
Source: Copernicus journal article supplement (doi:10.5194/acp-18-735-2018), 2018-01-22
Supplement: Supplementary file 1 [file acp-18-735-2018-supplement.pdf]

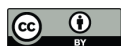

*Supplement of*

## **Top-down constraints on global N<sub>2</sub>O emissions at optimal resolution: application of a new dimension reduction technique**

**Kelley C. Wells et al.**

*Correspondence to:* Dylan B. Millet (dbm@umn.edu)

The copyright of individual parts of the supplement might differ from the CC BY 4.0 License.

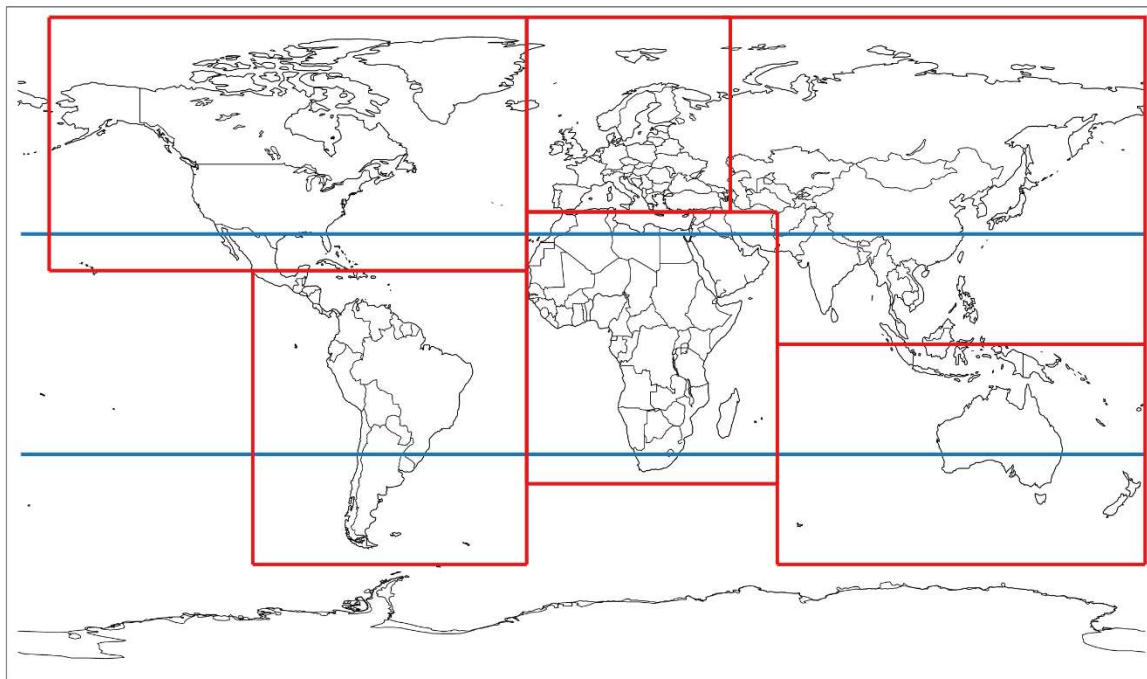

**Figure S1: Bounding boxes for the six continental (red) and three ocean (blue) regions considered in this study.**

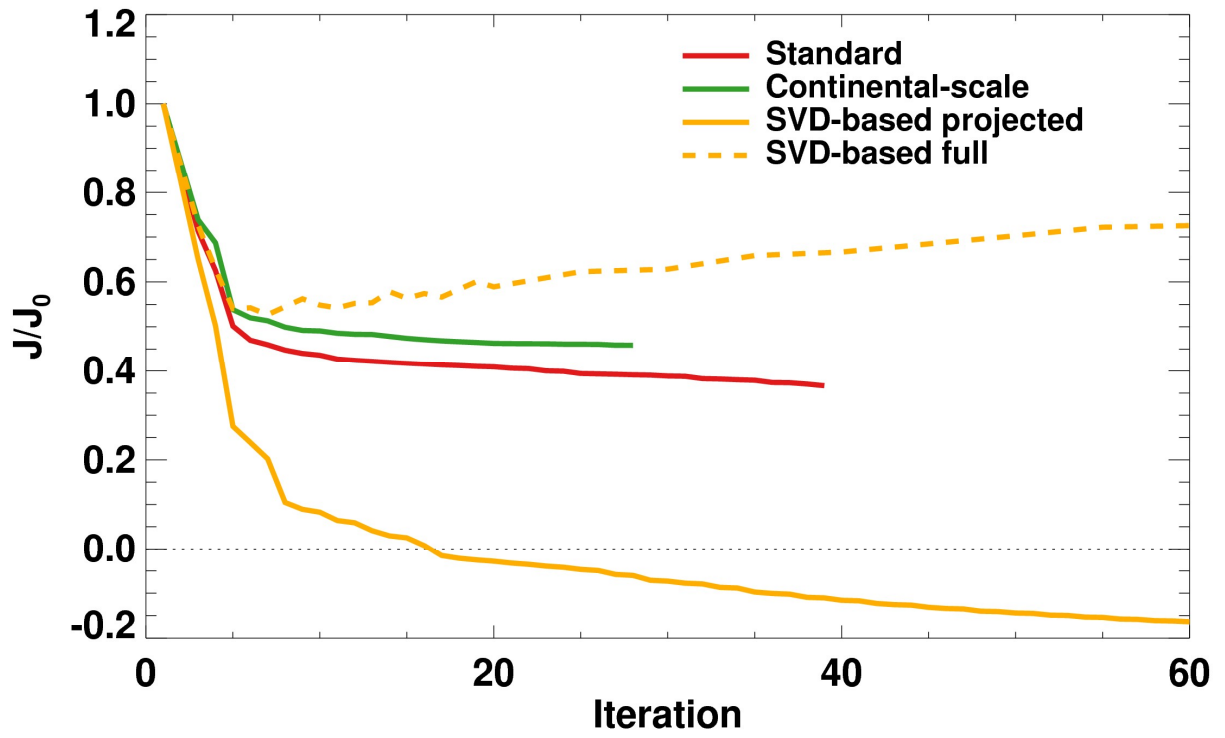

Figure S2: Cost function evolution (expressed as the ratio of the final cost function,  $J$ , to the initial cost function,  $J_0$ ) for the three inversion frameworks used in this study: the standard inversion (red solid line), continental-scale inversion (green solid line), and the SVD-based inversion (gold solid line). Because the SVD-based inversion uses the projected cost function formulation, we also calculate the full cost function evolution using the forward model (gold dashed line).

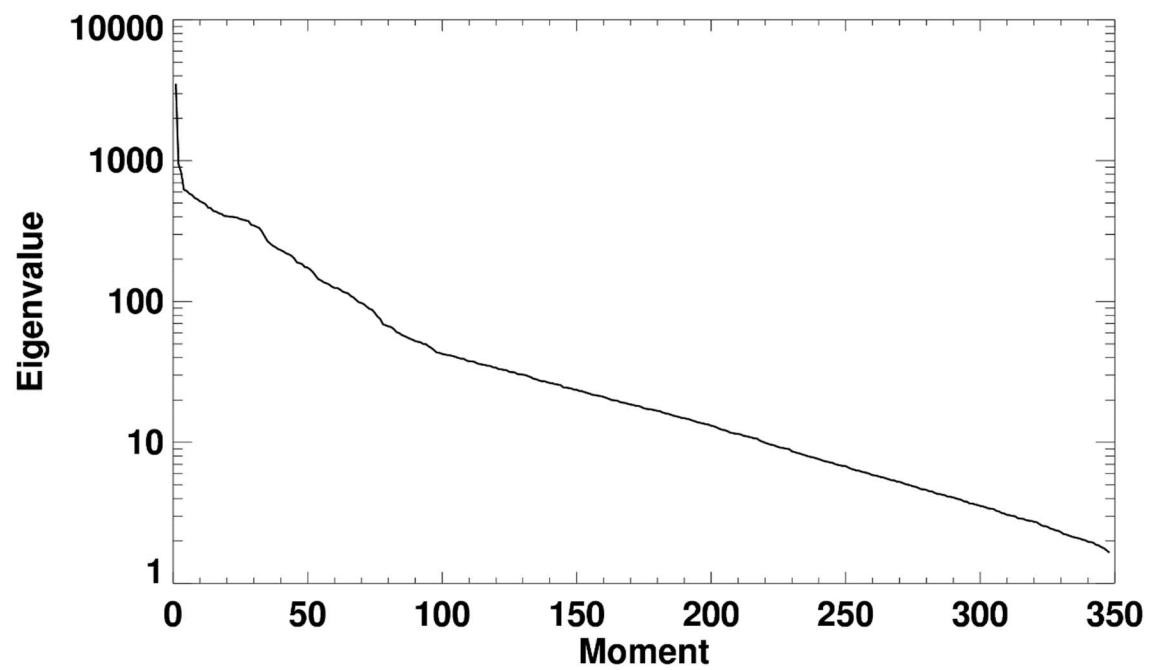

Figure S3. Eigenvalue spectra for the 350 moments used in the SVD-based inversion.

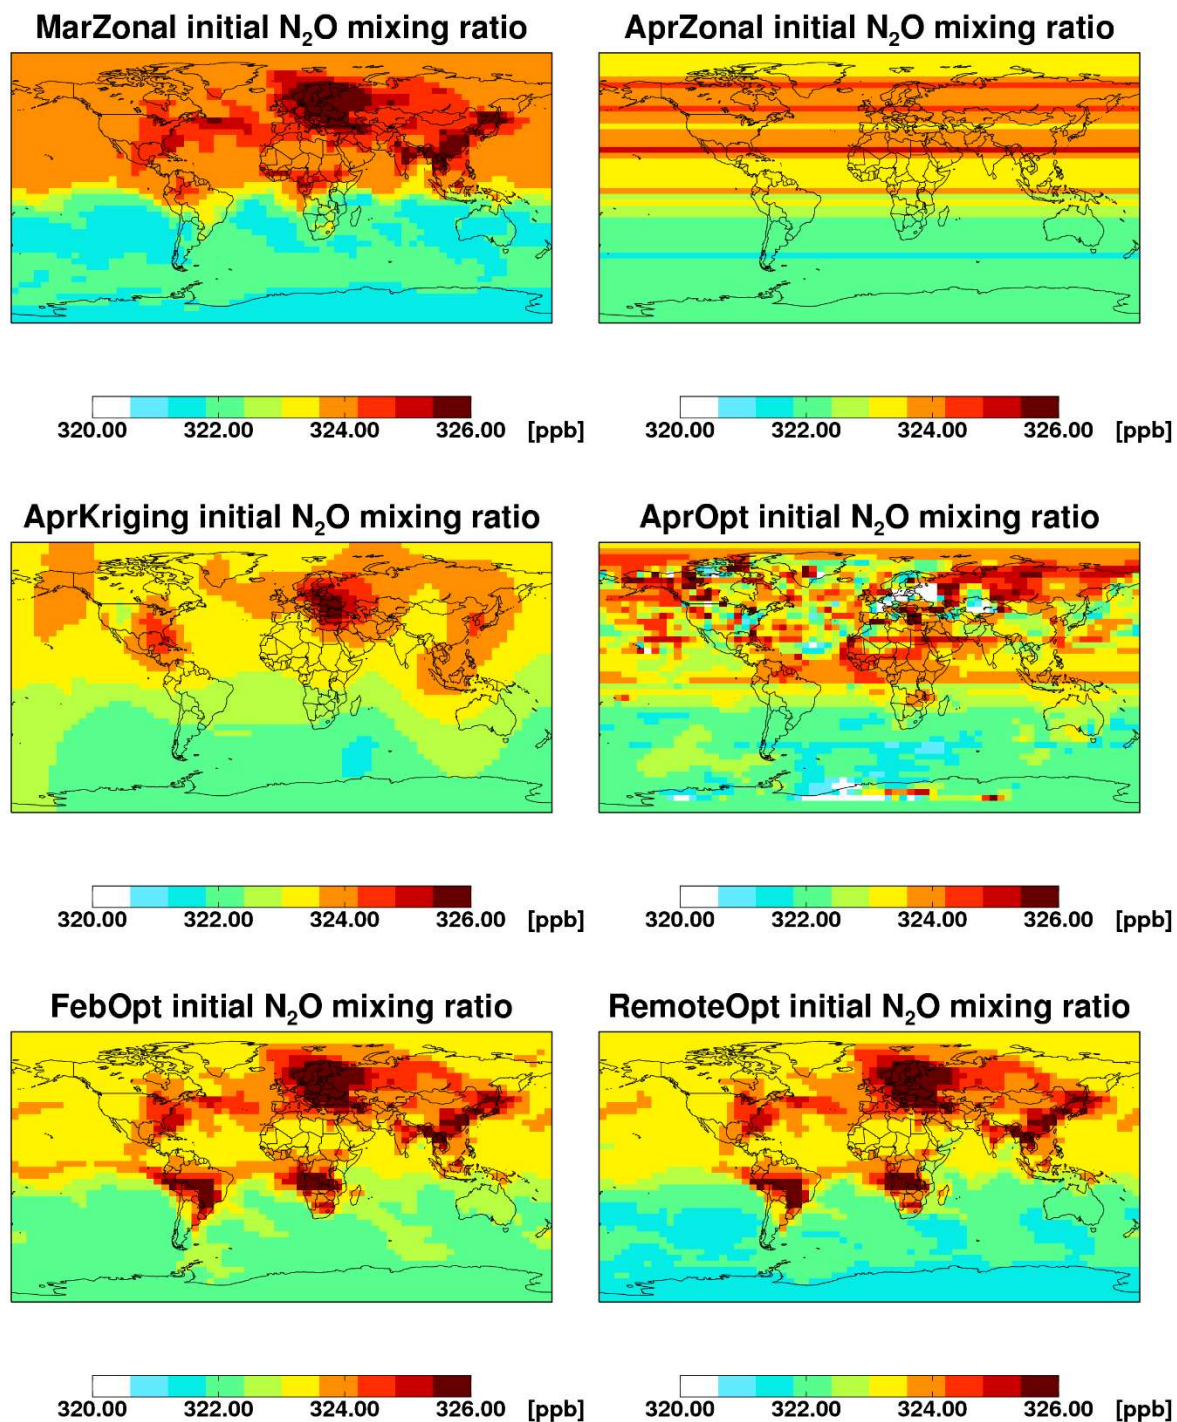

Figure S4. Initial surface  $\text{N}_2\text{O}$  mixing ratios for 1 April 2010 as determined using the six different initial condition setups listed in Table 1.
